# Supplementary material for: A MoS2 based silver-doped ZnO nanocomposite and its antibacterial activity against β-lactamase expressing Escherichia coli
Source: Royal Society of Chemistry journal article supplement (doi:10.1039/d2ra00163b), 2022-01-01
Supplement: d2ra00163b1.pdf [file d2ra00163b1.pdf]

| Strain        | N | MIC ( $\mu\text{g mL}^{-1}$ )                                      |                                                                    |                                                                    |
|---------------|---|--------------------------------------------------------------------|--------------------------------------------------------------------|--------------------------------------------------------------------|
|               |   | ZO                                                                 | AZO                                                                | AZM                                                                |
| ATCC 25922    | 1 | <br>500<br>250<br>125<br>62.5<br>31.25<br>15.63<br>7.8<br>3.9<br>0 | <br>500<br>250<br>125<br>62.5<br>31.25<br>15.63<br>7.8<br>3.9<br>0 | <br>500<br>250<br>125<br>62.5<br>31.25<br>15.63<br>7.8<br>3.9<br>0 |
|               | 2 | <br>500<br>250<br>125<br>62.5<br>31.25<br>15.63<br>7.8<br>3.9<br>0 | <br>500<br>250<br>125<br>62.5<br>31.25<br>15.63<br>7.8<br>3.9<br>0 | <br>500<br>250<br>125<br>62.5<br>31.25<br>15.63<br>7.8<br>3.9<br>0 |
|               | 3 | <br>500<br>250<br>125<br>62.5<br>31.25<br>15.63<br>7.8<br>3.9<br>0 | <br>500<br>250<br>125<br>62.5<br>31.25<br>15.63<br>7.8<br>3.9<br>0 | <br>500<br>250<br>125<br>62.5<br>31.25<br>15.63<br>7.8<br>3.9<br>0 |
| CCARM 1011    | 1 | <br>500<br>250<br>125<br>62.5<br>31.25<br>15.63<br>7.8<br>3.9<br>0 | <br>500<br>250<br>125<br>62.5<br>31.25<br>15.63<br>7.8<br>3.9<br>0 | <br>500<br>250<br>125<br>62.5<br>31.25<br>15.63<br>7.8<br>3.9<br>0 |
|               | 2 | <br>500<br>250<br>125<br>62.5<br>31.25<br>15.63<br>7.8<br>0        | <br>500<br>250<br>125<br>62.5<br>31.25<br>15.63<br>7.8<br>0        | <br>500<br>250<br>125<br>62.5<br>31.25<br>15.63<br>7.8<br>0        |
|               | 3 | <br>500<br>250<br>125<br>62.5<br>31.25<br>15.63<br>7.8<br>0        | <br>500<br>250<br>125<br>62.5<br>31.25<br>15.63<br>7.8<br>0        | <br>250<br>125<br>62.5<br>31.25<br>15.63<br>7.8<br>3.9<br>0        |
| CCARM 1013    | 1 | <br>250<br>125<br>62.5<br>31.25<br>15.63<br>7.8<br>3.9<br>0        | <br>250<br>125<br>62.5<br>31.25<br>15.63<br>7.8<br>3.9<br>0        | <br>250<br>125<br>62.5<br>31.25<br>15.63<br>7.8<br>3.9<br>0        |
|               | 2 | <br>500<br>250<br>125<br>62.5<br>31.25<br>15.63<br>7.8<br>0        | <br>500<br>250<br>125<br>62.5<br>31.25<br>15.63<br>7.8<br>0        | <br>500<br>250<br>125<br>62.5<br>31.25<br>15.63<br>7.8<br>0        |
|               | 3 | <br>500<br>250<br>125<br>62.5<br>31.25<br>15.63<br>7.8<br>0        | <br>500<br>250<br>125<br>62.5<br>31.25<br>15.63<br>7.8<br>0        | <br>500<br>250<br>125<br>62.5<br>31.25<br>15.63<br>7.8<br>0        |
| CCARM 1368    | 1 | <br>500<br>250<br>125<br>62.5<br>31.25<br>15.63<br>7.81<br>0       | <br>500<br>250<br>125<br>62.5<br>31.25<br>15.63<br>7.81<br>0       | <br>500<br>250<br>125<br>62.5<br>31.25<br>15.63<br>7.81<br>0       |
|               | 2 | <br>500<br>250<br>125<br>62.5<br>31.25<br>0                        | <br>500<br>250<br>125<br>62.5<br>31.25<br>0                        | <br>500<br>250<br>125<br>62.5<br>31.25<br>0                        |
|               | 3 | <br>500<br>250<br>125<br>62.5<br>31.25<br>0                        | <br>500<br>250<br>125<br>62.5<br>31.25<br>0                        | <br>500<br>250<br>125<br>62.5<br>31.25<br>0                        |
| CCARM 1381    | 1 | <br>500<br>250<br>125<br>62.5<br>31.25<br>15.63<br>7.81<br>0       | <br>500<br>250<br>125<br>62.5<br>31.25<br>15.63<br>7.81<br>0       | <br>500<br>250<br>125<br>62.5<br>31.25<br>15.63<br>7.81<br>0       |
|               | 2 | <br>500<br>250<br>125<br>62.5<br>31.25<br>0                        | <br>500<br>250<br>125<br>62.5<br>31.25<br>0                        | <br>500<br>250<br>125<br>62.5<br>31.25<br>0                        |
|               | 3 | <br>500<br>250<br>125<br>62.5<br>31.25<br>0                        | <br>500<br>250<br>125<br>62.5<br>31.25<br>0                        | <br>500<br>250<br>125<br>62.5<br>31.25<br>0                        |
| ATCC BAA-2452 | 1 | <br>250<br>125<br>62.5<br>31.25<br>15.63<br>7.8<br>3.9<br>0        | <br>250<br>125<br>62.5<br>31.25<br>15.63<br>7.8<br>3.9<br>0        | <br>250<br>125<br>62.5<br>31.25<br>15.63<br>7.8<br>3.9<br>0        |

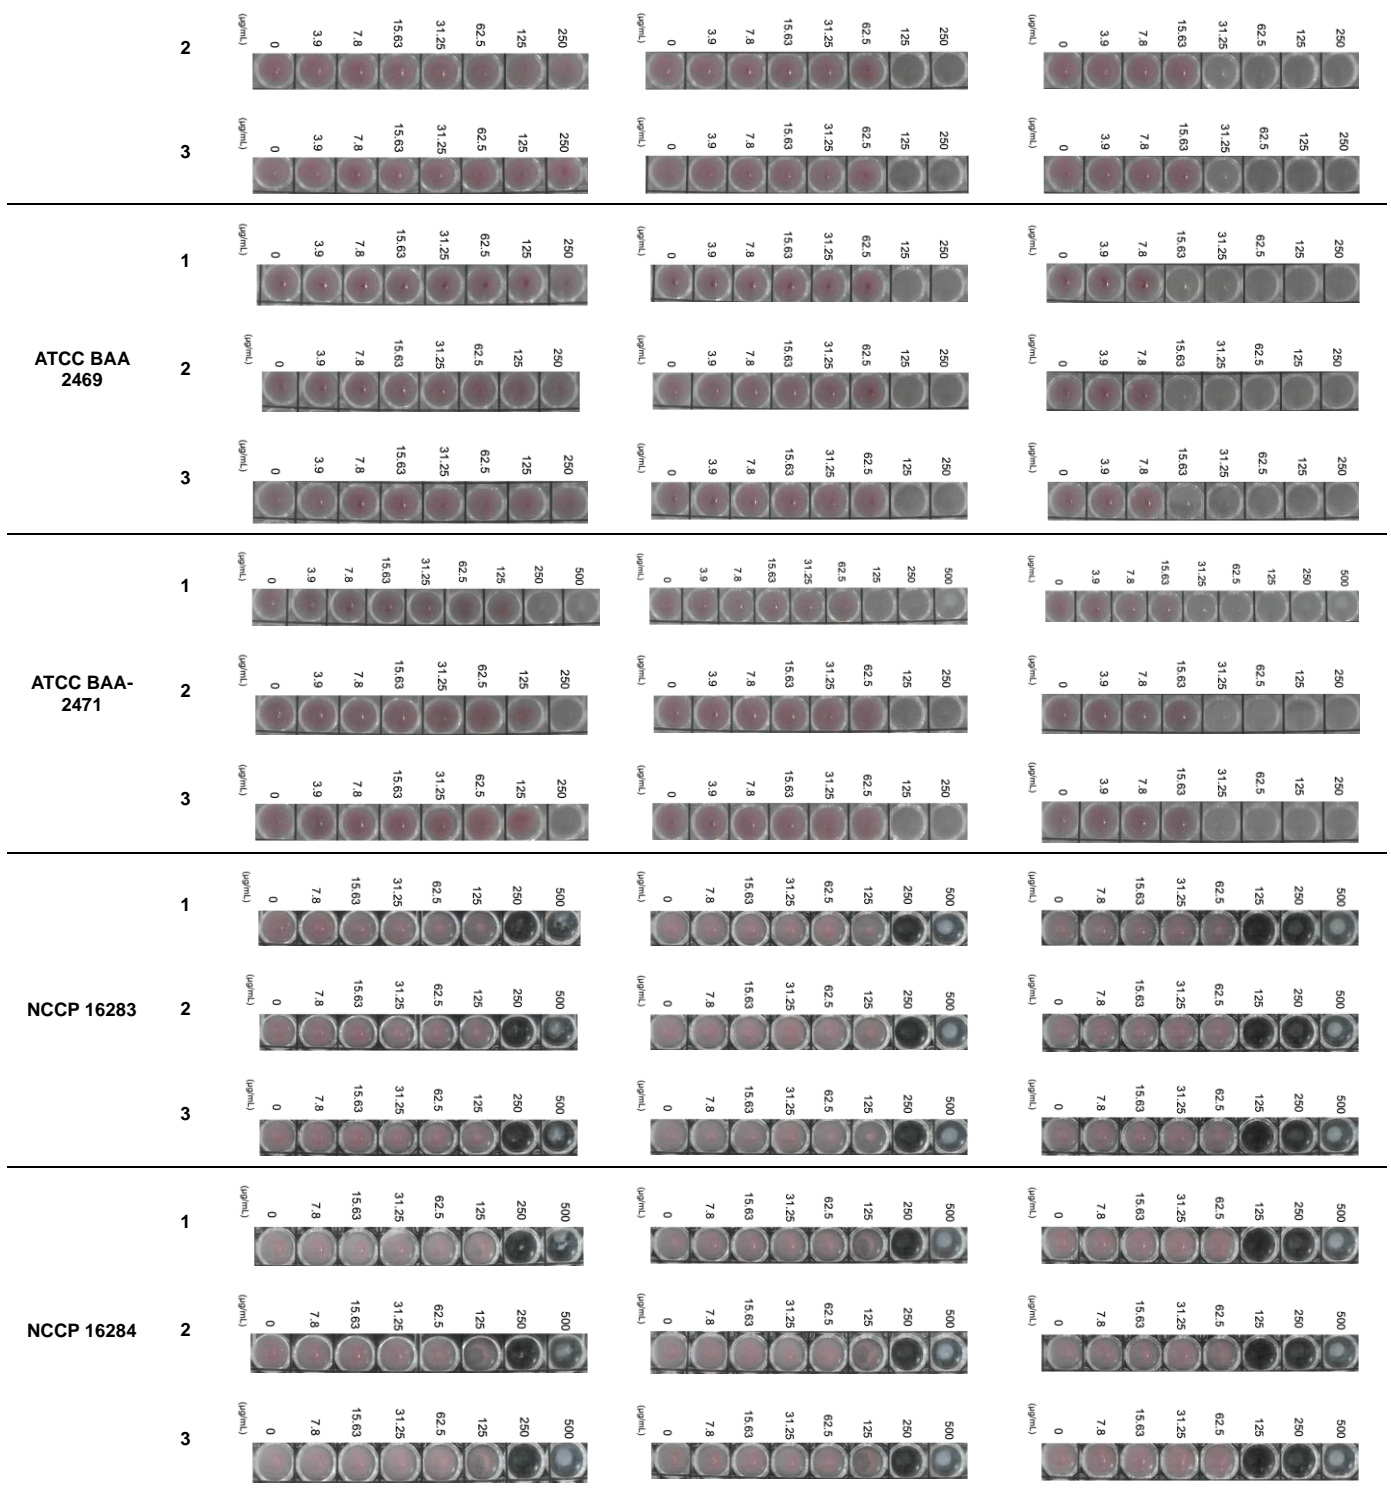

**Fig S1.** Minimum inhibitory concentrations (MICs) of ZO, AZO, and AZM against multidrug-resistant (MDR) *E. coli*. The image of MIC results in 96-well were photographed. The pink color indicates the bacterial growth, while white precipitates shown in the wells indicate the insoluble nanoparticles based on the colored reactions using AlamarBlue™. N indicates the number of repeats.

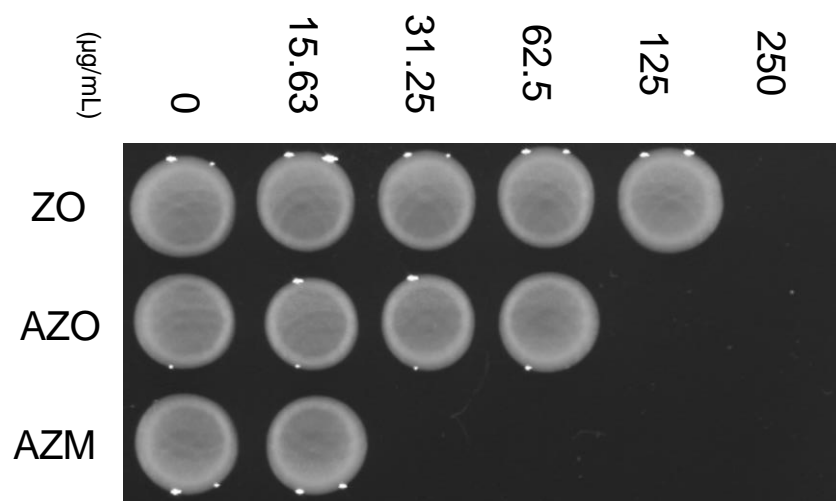

**Fig S2.** Bactericidal activity of ZO, AZO and AZM against multidrug-resistant (MDR) *E. coli* (ATCC BAA-2471). Aliquots (10  $\mu$ L) of bacterial cell lysates treated with materials at indicated concentrations were spotted onto LB agar plate and incubated at 37  $^{\circ}$ C for 24 h. The plate was imaged by ChemiDoc MP<sup>®</sup> imaging system and processed by Image Lab Software (Bio-Rad, CA, USA). One of the triplicate data was shown here.
